# Supplementary material
Source: publisher figshare collection journal article supplement (https://sage.figshare.com/ndownloader/files/17485691)
Supplement: Supplementary file 1 [file 17485691]

**eTable 1** Univariate analysis of demographic and clinical characteristics based on mortality

|                              |          | Alive N (%) | Dead N (%) | P                  |
|------------------------------|----------|-------------|------------|--------------------|
|                              |          | N=139       | N=15       |                    |
| Gender                       | Male     | 90 (64.7%)  | 10 (66.7%) | 1.000 <sup>*</sup> |
|                              | Female   | 49 (35.3%)  | 5 (33.3%)  |                    |
| Donor type                   | Deceased | 23 (16.5%)  | 4 (26.7%)  | 0.302 <sup>*</sup> |
|                              | Living   | 116 (83.5%) | 11 (73.3%) |                    |
| Hypertension                 | No       | 29 (20.9%)  | 0 (0.0%)   | 0.076 <sup>*</sup> |
|                              | Yes      | 110 (79.1%) | 15 (100%)  |                    |
| Diabetes mellitus            | No       | 128 (92.1%) | 12 (80.0%) | 0.141 <sup>*</sup> |
|                              | Yes      | 11 (7.9%)   | 3 (20.0%)  |                    |
| Known coronary heart disease | No       | 132 (95.0%) | 12 (80.0%) | 0.059 <sup>*</sup> |
|                              | Yes      | 7 (5.0%)    | 3 (1.9%)   |                    |

<sup>\*</sup>Chi-square test.
